# Supplementary material
Source: Research Square preprint supplement (doi:10.21203/rs.3.rs-9200849/v1)
Supplement: Supplementary file 1 [file 34bfef570235e6e110f40a93.docx]

Supplementary Table S1. Significant difference in community structure among two groups.

| level | dist | test | sub-condition1 vs sub-condition2 | Df | SumsOfSqs | MeanSqs | F.Model | R2 | P-value |
| --- | --- | --- | --- | --- | --- | --- | --- | --- | --- |
| Genus | bray | adonis | C.p vs H | 1 | 0.913 | 0.913 | 3.544 | 0.262 | 0.003 |
